# Supplementary material for: Hyaluronic Acid Nanoparticles for Immunogenic Chemotherapy of Leukemia and T-Cell Lymphoma
Source: MDPI journal article supplement (doi:10.3390/pharmaceutics14020466), 2022-02-21
Supplement: s1 [file s1]

# Supplementary Materials: Hyaluronic Acid Nanoparticles for Immunogenic Chemotherapy of Leukemia and T-Cell Lymphoma

Vinu Krishnan, Vimisha Dharamdasani, Shirin Bakre, Ved Dhole, Debra Wu, Bogdan Budnik and Samir Mitragotri

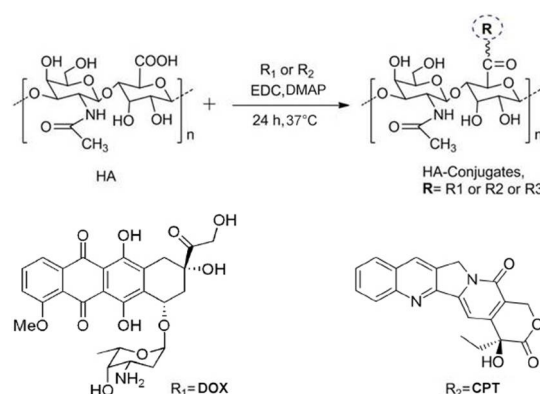

**Figure S1.** Reaction scheme and conditions for HA polymer-drug conjugates at different ratios.

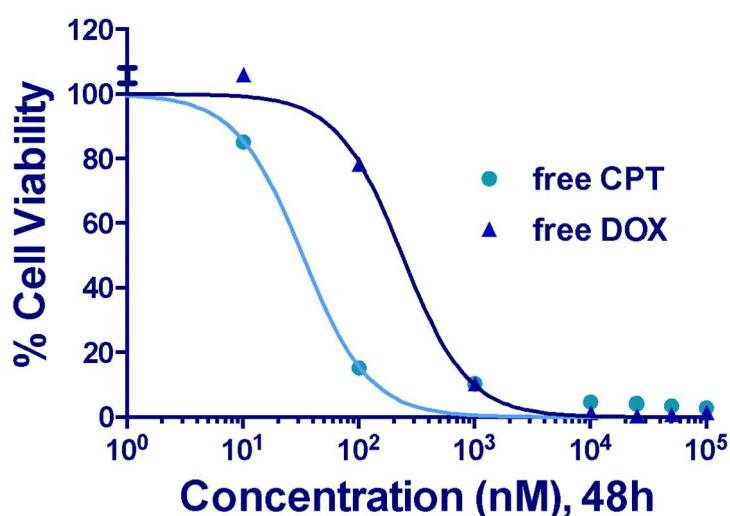

**Figure S2.** Dose-response curves and IC<sub>50</sub> values for free DOX and free CPT treatment with HL-60.

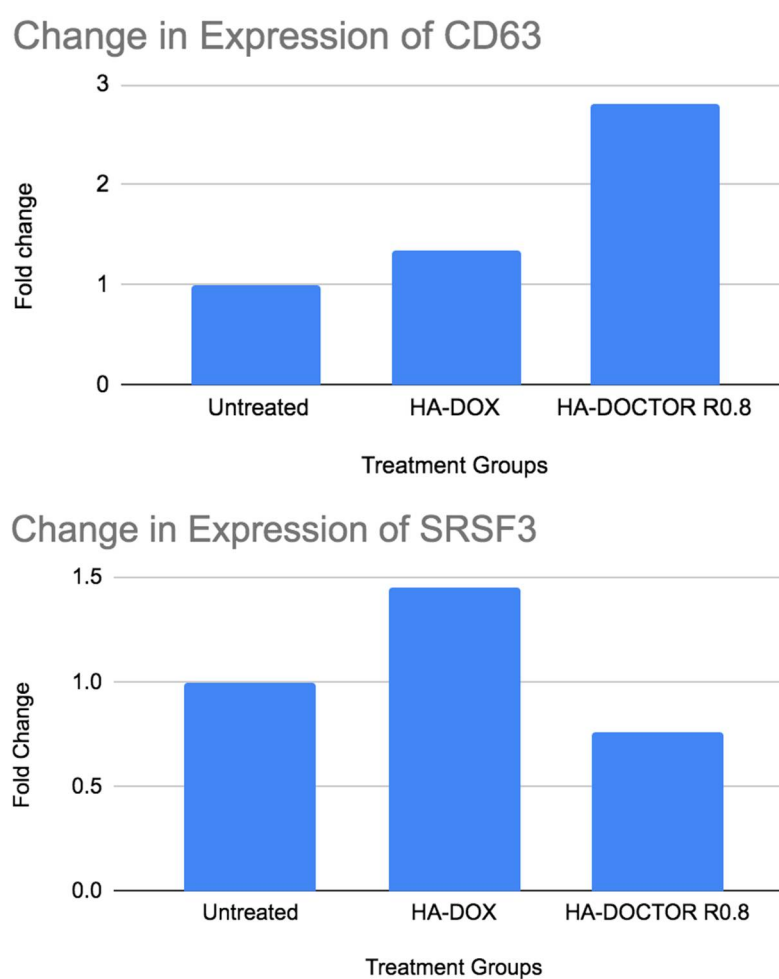

**Figure S3. QPCR Validation.** The mRNA expression of two representative proteins (SRSF3 and CD63) from the proteomics list was validated.

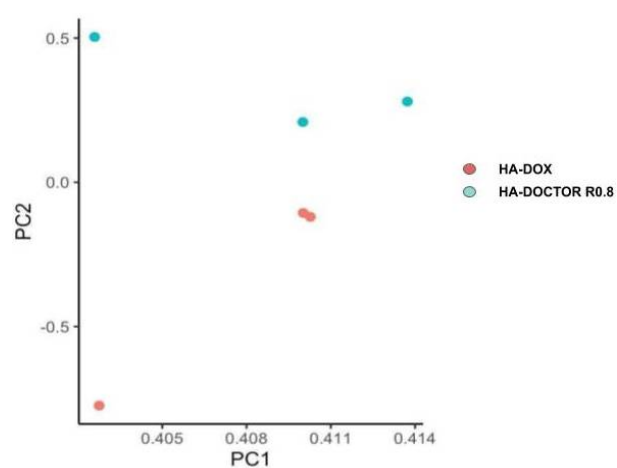

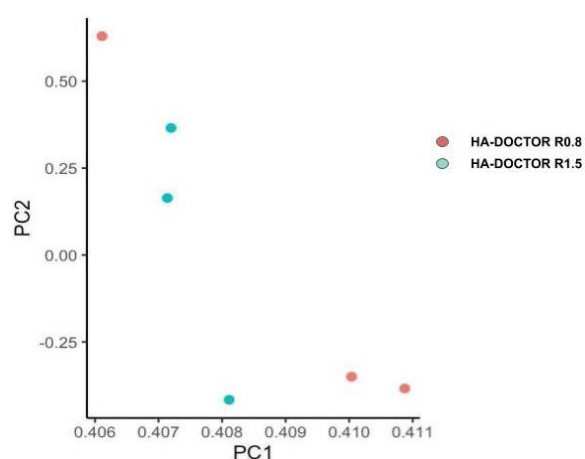

**Figure S4. Principal Component Analysis** was performed to bring out strong patterns within the dataset.

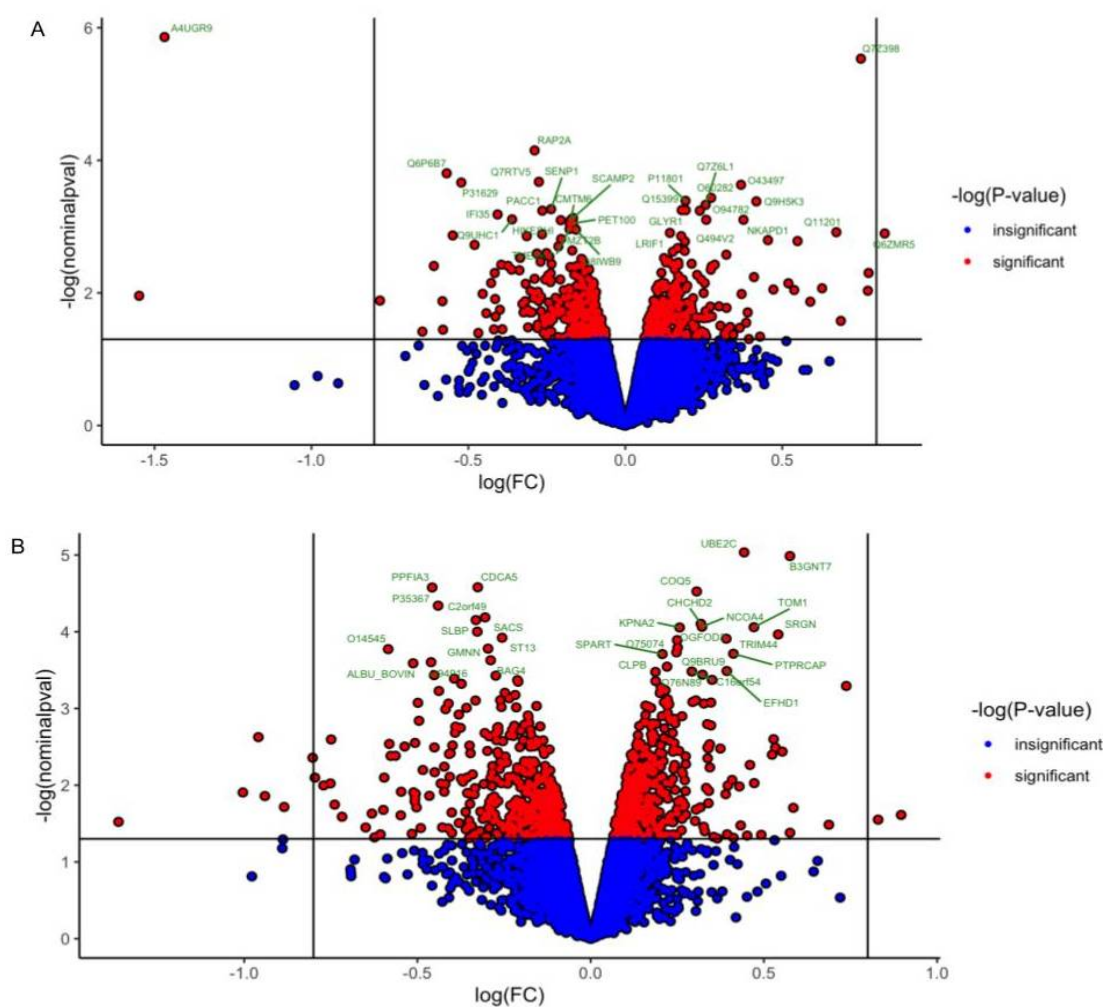

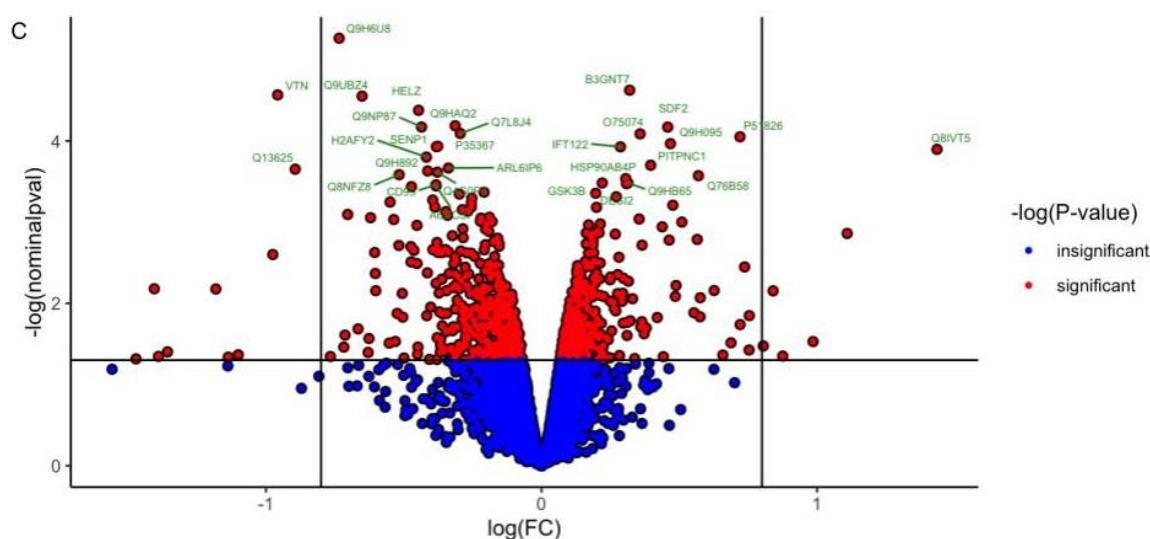

**Figure S5. Differentially expressed proteins in treated vs untreated samples.** Volcano plot illustrates significantly differentially abundant proteins. The  $-\log_{10}$  (Benjamini–Hochberg corrected  $P$  value) is plotted against the  $\log_2$  (fold change). (A) Untreated vs HA-DOX (B) Untreated vs HA-DOX-CPT R0.8 (C) Untreated vs HA-DOX-CPT R1.5.

**Table S1.** The drugs were incorporated onto HA in a series of molar ratios by varying the amount of drugs added and reaction time.

| DOX:CPT (Ratio, R) | HA (mmoles) | DOX (mmoles) | CPT (mmoles) |
|--------------------|-------------|--------------|--------------|
| 0.8:1              | 0.05        | 0.006        | 0.021        |
| 1.5:1              | 0.05        | 0.01         | 0.021        |
| 12:1               | 0.05        | 0.05         | 0.006        |
| 21:1               | 0.05        | 0.05         | 0.003        |

**Table S2.** List of cell lines used.

| Cell name    | Description                                    |
|--------------|------------------------------------------------|
| HL-60        | Acute myeloid leukemia                         |
| HL-60/MX2    | Multidrug-resistant Acute myeloid leukemia     |
| MV4;11       | Acute monocytic leukemia                       |
| MOLM-13      | Acute myeloid leukemia                         |
| MOLM-14      | Acute myeloid leukemia                         |
| THP-1        | Acute monocytic leukemia                       |
| K562         | BCR-ABL1 positive chronic myelogenous leukemia |
| SUP-M2       | Alk positive - anaplastic large cell lymphoma  |
| DL-40        | Alk negative - anaplastic large cell lymphoma  |
| L82          | Alk positive - anaplastic large cell lymphoma  |
| KiJK         | Alk positive - anaplastic large cell lymphoma  |
| FEPD         | Alk negative - anaplastic large cell lymphoma  |
| HUT-78: CTCL | Human T cell lymphoma                          |
| MTA: NK-LL   | NK/T-cell lymphoma                             |

**Table S3.** Dose-response curves and IC50 values for free DOX and free CPT treatment with HL-60.

| Table 3           | Free DOX (nM) | Free CPT (nM) |
|-------------------|---------------|---------------|
| IC90/HL-60 (48 h) | 993 ± 0.16    | 141 ± 0.15    |

**Table S4.** Summary of IC90 and C.I. values for HA-DOX-CPT when treated with Acute Myeloid Leukemia cells (HL-60). HA-DOX-CPT achieves a high synergy with C.I. values <1.

| HA-DOX-CPT<br>HL-60, 72 h | IC90   | ~CPT Fold<br>Reduction | ~DOX Fold<br>Reduction | ~C.I.            |
|---------------------------|--------|------------------------|------------------------|------------------|
| 0.8                       | 96 nM  | 4×                     | >10×                   | 0.3(Synergistic) |
| 1.5                       | 401 nM | 2×                     | >10×                   | 0.6(Synergistic) |
| 12.0                      | 1 µM   | 6×                     | >10×                   | 0.2(Synergistic) |
| 21.0                      | 2 µM   | 5×                     | >10×                   | 0.2(Synergistic) |

**Table S5.** Summary of IC90 and C.I. values for HA-DOX-CPT when treated with drug-resistant Acute Myeloid Leukemia cells (HL-60/MX2). DOCTOR achieves a very high synergy with C.I. values <<1.

| HA-DOX-CPT<br>HL-60/MX2, 72 h | IC90   | ~CPT Fold<br>Reduction | ~DOX Fold<br>Reduction | ~C.I.              |
|-------------------------------|--------|------------------------|------------------------|--------------------|
| 0.8                           | 7 nM   | 12×                    | >10×                   | 0.09 (Synergistic) |
| 1.5                           | 65 nM  | 2×                     | >10×                   | 0.4(Synergistic)   |
| 12.0                          | 635 nM | 2×                     | >10×                   | 0.5(Synergistic)   |
| 21.0                          | 653 nM | 3×                     | >10×                   | 0.3(Synergistic)   |

**Table S6.** Summary of IC50 and C.I. values for DOCTOR when treated with Acute Monocytic Leukemia Cells (MV4; 11). HA-DOX-CPT achieves high synergy with C.I. values <1.

| HA-DOX-CPT<br>MV4;11, 72 h | IC90   | ~CPT Fold<br>Reduction | ~DOX Fold<br>Reduction | ~C.I.             |
|----------------------------|--------|------------------------|------------------------|-------------------|
| 0.8                        | 137 nM | 6×                     | >10×                   | 0.3 (Synergistic) |
| 1.5                        | 377 nM | 4×                     | >10×                   | 0.6(Synergistic)  |
| 12.0                       | 3 µM   | 4×                     | >10×                   | 0.2(Synergistic)  |
| 21.0                       | 3 µM   | 8×                     | >10×                   | 0.2(Synergistic)  |

**Table S7.** Summary of IC90 and C.I. values for DOCTOR when treated with Acute Myeloid Leukemia Cells (MOLM-13). HA-DOX-CPT achieves high synergy for ratios R0.8 and R1.5 with C.I. values <1.

| HA-DOX-CPT<br>MOLM-13, 72 h | IC90   | ~CPT Fold<br>Reduction | ~DOX Fold<br>Reduction | ~C.I.             |
|-----------------------------|--------|------------------------|------------------------|-------------------|
| 0.8                         | 13 nM  | 2×                     | >10×                   | 0.5 (Synergistic) |
| 1.5                         | 27 nM  | 2×                     | >10×                   | 0.5(Synergistic)  |
| 12.0                        | 621 nM | 1×                     | >10×                   | 1.5(Antagonistic) |
| 21.0                        | 985 nM | 1×                     | >10×                   | 1.4(Antagonistic) |

**Table S8.** Summary of IC90 and C.I. values for DOCTOR when treated with Acute Myeloid Leukemia Cells (MOLM-14). HA-DOX-CPT achieves high synergy for ratios R0.8 and R1.5 with C.I. values <1.

| HA-DOX-CPT<br>MOLM-14, 72 h | IC90   | ~CPT Fold<br>Reduction | ~DOX Fold<br>Reduction | ~C.I.             |
|-----------------------------|--------|------------------------|------------------------|-------------------|
| 0.8                         | 6 nM   | 2×                     | >10×                   | 0.7 (Synergistic) |
| 1.5                         | 9 nM   | 2×                     | >10×                   | 0.5(Synergistic)  |
| 12.0                        | 253 nM | 1×                     | >10×                   | 2(Antagonistic)   |

|      |        |    |      |                   |
|------|--------|----|------|-------------------|
| 21.0 | 345 nM | 1× | >10× | 1.5(Antagonistic) |
|------|--------|----|------|-------------------|

**Table S9.** Summary of IC<sub>90</sub> and C.I. values for DOCTOR when treated with Acute Monocytic Leukemia Cells (THP-1). HA-DOX-CPT achieves high synergy for ratios R0.8 and R1.5 with C.I. values <1.

| HA-DOX-CPT<br>THP-1, 72 h | IC <sub>90</sub> | ~CPT Fold<br>Reduction | ~DOX Fold<br>Reduction | ~C.I.             |
|---------------------------|------------------|------------------------|------------------------|-------------------|
| 0.8                       | 6 nM             | 2×                     | >10×                   | 0.5 (Synergistic) |
| 1.5                       | 9 nM             | 1.4×                   | >10×                   | 0.7(Synergistic)  |
| 12.0                      | 253 nM           | 1×                     | >10×                   | 1(Additive)       |
| 21.0                      | 345 nM           | 0.6×                   | >10×                   | 2(Antagonistic)   |

**Table S10.** Summary of IC<sub>90</sub> and C.I. values for DOCTOR when treated with BCR-ABL1+ Chronic Myeloid Leukemia Cells (K562). HA-DOX-CPT achieves very high synergy with C.I. values <<1.

| HA-DOX-CPT<br>K562, 72 h | IC <sub>90</sub> | ~CPT Fold<br>Reduction | ~DOX Fold<br>Reduction | ~C.I.             |
|--------------------------|------------------|------------------------|------------------------|-------------------|
| 0.8                      | 89 µM            | 1.6×                   | >10×                   | 0.6 (Synergistic) |
| 1.5                      | 44 µM            | 6×                     | >10×                   | 0.2(Synergistic)  |
| 12.0                     | 47 µM            | 45×                    | >10×                   | 0.02(Synergistic) |
| 21.0                     | 49 µM            | 76×                    | >10×                   | 0.01(Synergistic) |

**Table S11.** Summary of IC<sub>90</sub> and C.I. values for DOCTOR when treated with Alk+ anaplastic large cell lymphoma (SUP-M2). HA-DOX-CPT achieves high synergy with C.I. values <1.

| HA-DOX-CPT<br>SUP-M2, 48 h | IC <sub>90</sub> | ~CPT Fold<br>Reduction | ~DOX Fold<br>Reduction | ~C.I.             |
|----------------------------|------------------|------------------------|------------------------|-------------------|
| 0.8                        | 39 nM            | 3×                     | >10×                   | 0.4 (Synergistic) |
| 1.5                        | 41 nM            | 5×                     | >10×                   | 0.2(Synergistic)  |
| 12.0                       | 240 nM           | 7×                     | >10×                   | 0.2(Synergistic)  |
| 21.0                       | 467 nM           | 6×                     | >10×                   | 0.2(Synergistic)  |

**Table S12.** Summary of IC<sub>90</sub> and C.I. values for DOCTOR when treated with Alk- anaplastic large cell lymphoma (DL-40). HA-DOX-CPT achieves high synergy with C.I. values <1.

| HA-DOX-CPT<br>DL-40, 48 h | IC <sub>90</sub> | ~CPT Fold<br>Reduction | ~DOX Fold<br>Reduction | ~C.I.             |
|---------------------------|------------------|------------------------|------------------------|-------------------|
| 0.8                       | 7 nM             | 12×                    | >10×                   | 0.4 (Synergistic) |
| 1.5                       | 9 nM             | 17×                    | >10×                   | 0.2(Synergistic)  |
| 12.0                      | 97 nM            | 13×                    | >10×                   | 0.2(Synergistic)  |
| 21.0                      | 835 nM           | 11×                    | >10×                   | 0.2(Synergistic)  |

**Table S13.** Summary of IC<sub>90</sub> and C.I. values for DOCTOR when treated with Alk+ anaplastic large cell lymphoma (L82). HA-DOX-CPT achieves high synergy for ratios R0.8 and R1.5 with C.I. values <1.

| HA-DOX-CPT<br>L82, 48 h | IC <sub>90</sub> | ~CPT Fold Reduc-<br>tion | ~DOX Fold Reduc-<br>tion | ~C.I.             |
|-------------------------|------------------|--------------------------|--------------------------|-------------------|
| 0.8                     | 28 nM            | 6×                       | >10×                     | 0.2 (Synergistic) |
| 1.5                     | 73 nM            | 5×                       | >10×                     | 0.2(Synergistic)  |
| 12.0                    | 4 µM             | 0.7×                     | >10×                     | 1.5(Antagonistic) |
| 21.0                    | 6 µM             | 0.8×                     | >10×                     | 1.3(Antagonistic) |

**Table S14.** Summary of IC90 and C.I. values for DOCTOR when treated with Alk+ anaplastic large cell lymphoma (Ki-JK). HA-DOX-CPT achieves high synergy for ratios R0.8, R1.5 and R12 with C.I values <1.

| HA-DOX-CPT<br>KiJK, 48 h | IC90   | ~CPT Fold Reduc-<br>tion | ~DOX Fold Reduc-<br>tion | ~C.I.             |
|--------------------------|--------|--------------------------|--------------------------|-------------------|
| 0.8                      | 21 nM  | 3×                       | >10×                     | 0.4 (Synergistic) |
| 1.5                      | 46 nM  | 2×                       | >10×                     | 0.5(Synergistic)  |
| 12.0                     | 506 nM | 2×                       | >10×                     | 0.6(Synergistic)  |
| 21.0                     | 2 µM   | 1×                       | >10×                     | 1.4(Antagonistic) |

**Table S15.** Summary of IC90 and C.I. values for DOCTOR when treated with Alk- anaplastic large cell lymphoma (FEPD). HA-DOX-CPT achieves high synergy for ratios R1.5, R12 and R21 with C.I values <1.

| HA-DOX-CPT<br>FEPD, 48 h | IC90   | ~CPT Fold Reduction | ~DOX Fold Reduction | ~C.I.              |
|--------------------------|--------|---------------------|---------------------|--------------------|
| 0.8                      | 17 nM  | 1×                  | >10×                | 1.2 (Antagonistic) |
| 1.5                      | 9 nM   | 3×                  | >10×                | 0.3(Synergistic)   |
| 12.0                     | 113 nM | 2×                  | >10×                | 0.6(Synergistic)   |
| 21.0                     | 214 nM | 2×                  | >10×                | 0.6(Synergistic)   |

**Table S16.** Summary of IC90 and C.I. values for DOCTOR when treated with T-cell lymphoma (HUT-78:CTCL). HA-DOX-CPT achieves very high synergy for all ratios with C.I values <<1.

| HA-DOX-CPT<br>HUT-78:CTCL, 48h | IC90   | ~CPT Fold Reduction | ~DOX Fold Reduction | ~C.I.              |
|--------------------------------|--------|---------------------|---------------------|--------------------|
| 0.8                            | 404 nM | 2×                  | >10×                | Highly synergistic |
| 1.5                            | 807 nM | 2×                  | >10×                | Highly synergistic |
| 12.0                           | 4 µM   | 3×                  | >10×                | Highly synergistic |
| 21.0                           | 4 µM   | 5×                  | >10×                | Highly synergistic |

**Table S17.** Summary of IC90 and C.I. values for DOCTOR when treated with NK/T-cell lymphoma (MTA:NK-LL). HA-DOX-CPT achieves very high synergy for all ratios with C.I values <<1.

| HA-DOX-CPT<br>MTA:NK-LL, 48 h | IC90   | ~CPT Fold Reduction | ~DOX Fold Reduction | ~C.I.                         |
|-------------------------------|--------|---------------------|---------------------|-------------------------------|
| 0.8                           | 6 nM   | 0.02×               | >10×                | >>>!<br>(Highly Antagonistic) |
| 1.5                           | 8 nM   | 0.03×               | >10×                | >>>!<br>(Highly Antagonistic) |
| 12.0                          | 85 nM  | 0.02×               | >10×                | >>>!<br>(Highly Antagonistic) |
| 21.0                          | 158 nM | 0.02×               | >10×                | >>>!<br>(Highly Antagonistic) |

**Table S18.** Select protein expression level comparison between HA-DOX and HA-DOX-CPT treated HL-60/MX2 identified by MS. Proteins upregulated in HA-DOX treatment, downregulated in HA-DOX-CPT R0.8 treatment (Orange). Proteins downregulated in HA-DOX treatment, upregulated in HA-DOX-CPT R0.8 treatment (Blue).

| Protein symbol | Accession no | logFC         | P.Value | adj.P.Val    | FC           |
|----------------|--------------|---------------|---------|--------------|--------------|
| UBE2C          | O00762       | 0.4460381404  | 0.0005  | 0.1135079049 | 1.178780071  |
| HCK            | P08631       | 0.4460381404  | 0.0005  | 0.1135079049 | 1.178780071  |
| PARP1          | P09874       | −0.4479515105 | 0.0004  | 0.1014295581 | −1.180831232 |
| CDC5L          | Q99459       | −0.2917023084 | 0.0004  | 0.1014295581 | −1.019849398 |

|        |        |               |        |               |               |
|--------|--------|---------------|--------|---------------|---------------|
| DDX21  | Q9NR30 | −0.4320615448 | 0.0002 | 0.1000606193  | −1.163859617  |
| PRPF3  | O43395 | −0.3516134476 | 0.0002 | 0.1000606193  | −1.080060052  |
| MTA2   | O94776 | −0.2546312959 | 0.0003 | 0.1000606193  | −0.9834804749 |
| AHCTF1 | Q8WYP5 | −0.2821078326 | 0.0004 | 0.1014295581  | −1.010373017  |
| RREB1  | Q92766 | −0.5336812874 | 0.0002 | 0.09620541093 | −1.274920884  |
| RFC1   | P35251 | −0.4535969867 | 0.0002 | 0.09620541093 | −1.186895383  |
| DNMT1  | P26358 | −0.3576600781 | 0.0002 | 0.09620541093 | −1.086238648  |
| UHRF1  | Q96T88 | −0.3205797224 | 0.0002 | 0.1000606193  | −1.048645259  |

**Table S19.** Select protein expression level comparison between HA-DOX-CPT R0.8 and HA-DOX-CPT R1.5 treated HL-60/MX2 identified by MS. Proteins upregulated in HA-DOX-CPT R0.8 treatment, downregulated in HA-DOX-CPT R1.5 treatment (Yellow). Proteins downregulated in HA-DOX-CPT R0.8 treatment, upregulated in HA-DOX-CPT R1.5 treatment (Green).

| Protein symbol | Accession no | logFC          | P.Value | adj.P.Val    | FC            |
|----------------|--------------|----------------|---------|--------------|---------------|
| SACS           | Q9NZJ4       | 0.3346999833   | 0.0005  | 0.3497103337 | 1.062877871   |
| METTL21A       | Q8WXB1       | 0.5720247552   | 0.003   | 0.5495071319 | 1.318440477   |
| SRGN           | P10124       | −0.5866405117  | 0.00003 | 0.1877787186 | −1.33527275   |
| UBE2C          | O00762       | −0.4240619723  | 0.0001  | 0.3405551606 | −1.155369063  |
| CHCHD2         | Q9Y6H1       | −0.2947821597  | 0.0003  | 0.3405551606 | −1.022900884  |
| HECTD1         | Q9ULT8       | −0.2657369911  | 0.0004  | 0.3497103337 | −0.9943066241 |
| TRIM44         | Q96DX7       | −0.3000591407  | 0.0007  | 0.3603241685 | −1.028140108  |
| APLP2          | Q06481       | −0.2596946688  | 0.0007  | 0.3603241685 | −0.9884091287 |
| B3GNT7         | Q8NFL0       | −0.2534026639  | 0.001   | 0.4846378327 | −0.9822863613 |
| NCOA4          | Q13772       | −0.2749716536  | 0.001   | 0.4846378327 | −1.003353676  |
| KAT7           | O95251       | −0.1725002038  | 0.002   | 0.5426893837 | −0.9051840012 |
| CD4            | P01730       | −0.03353779162 | 0.5     | 0.9356636827 | −0.7792635606 |
| KPNA2          | P52292       | −0.227254589   | 0.001   | 0.4846378327 | −0.9570404525 |
| C16orf54       | Q6UWD8       | −0.2525126954  | 0.002   | 0.5009142589 | −0.9814218415 |
| ALCAM          | Q13740       | −0.1861308509  | 0.003   | 0.5495071319 | −0.917968453  |
| MYB            | P10242       | −0.2869998708  | 0.003   | 0.5495071319 | −1.015199231  |



**Table S20.** Primer sequences for qPCR validation.

| Gene       | Primer Sequence               |
|------------|-------------------------------|
| Beta Actin | F: GCAAAGACCTGTACGCCA         |
|            | R: TGCATCCTGTCGGCAATG         |
| CD63       | F: TAGATTCGGCAGCCATGGCGGTGGAA |
|            | R: ACTGACCAGACCCCTACATCACC    |
| SRSF3      | F: GGCAATCTTGAAACAATGG        |
|            | R : TTCACCATTGACAGTTCCA       |
